# Supplementary material for: Epidemiology and Prognostic Importance of Atrial Fibrillation in Kidney Transplant Recipients: A Meta-Analysis
Source: MDPI journal article supplement (doi:10.3390/jcm7100370), 2018-10-19

## **Online supplementary data 1**

### **Search terms for systematic review.**

#### **Databases: Ovid MEDLINE**

1. exp atrial fibrillation/
2. atrial fibrillation\$.mp
3. 1 or 2
4. exp transplantation/
5. transplant\$.mp
6. 4 or 5
7. kidney.mp
8. renal.mp
9. 7 or 8
10. 6 and 9
11. 3 and 10

#### **Databases: EMBASE:**

All fields: 'atrial fibrillation'

AND All fields: 'kidney transplantation'

#### **Database: Cochrane Databases**

Search all text "atrial fibrillation" AND "kidney transplantation"

**Supplementary Figure 1:** Funnel plot evaluating prevalence of pre-existing AF in kidney transplant patients,

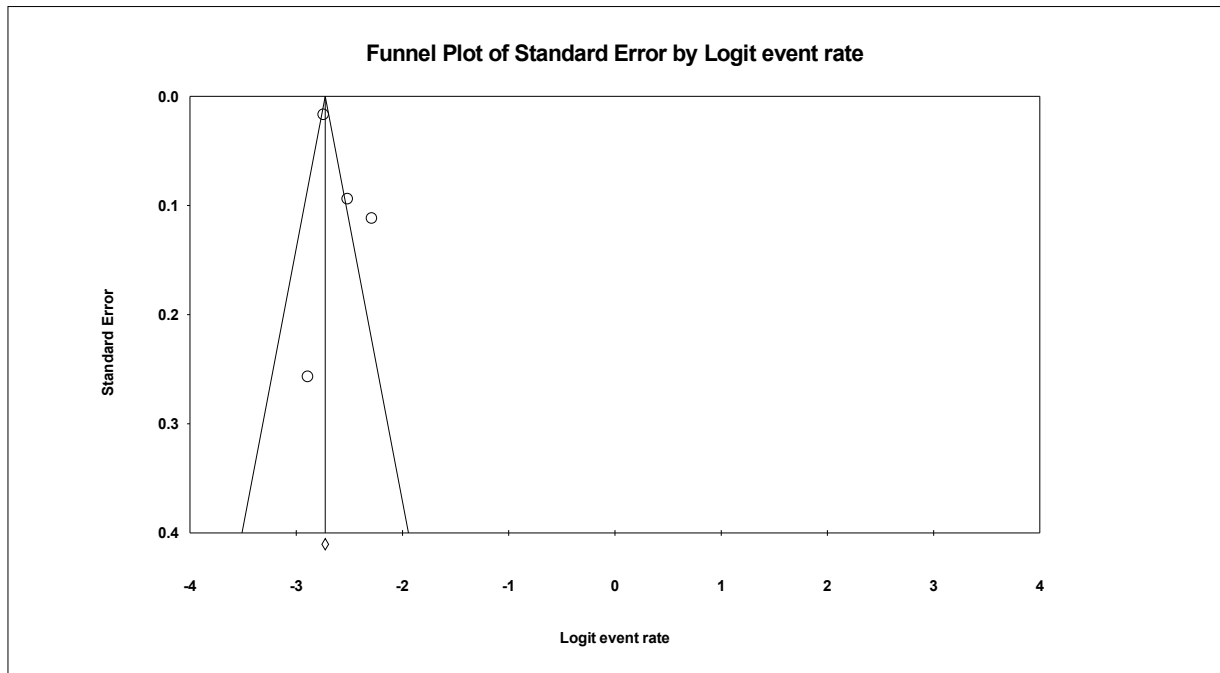

**Supplementary Figure 2:** Funnel plot evaluating incidence of postoperative AF in kidney transplant patients

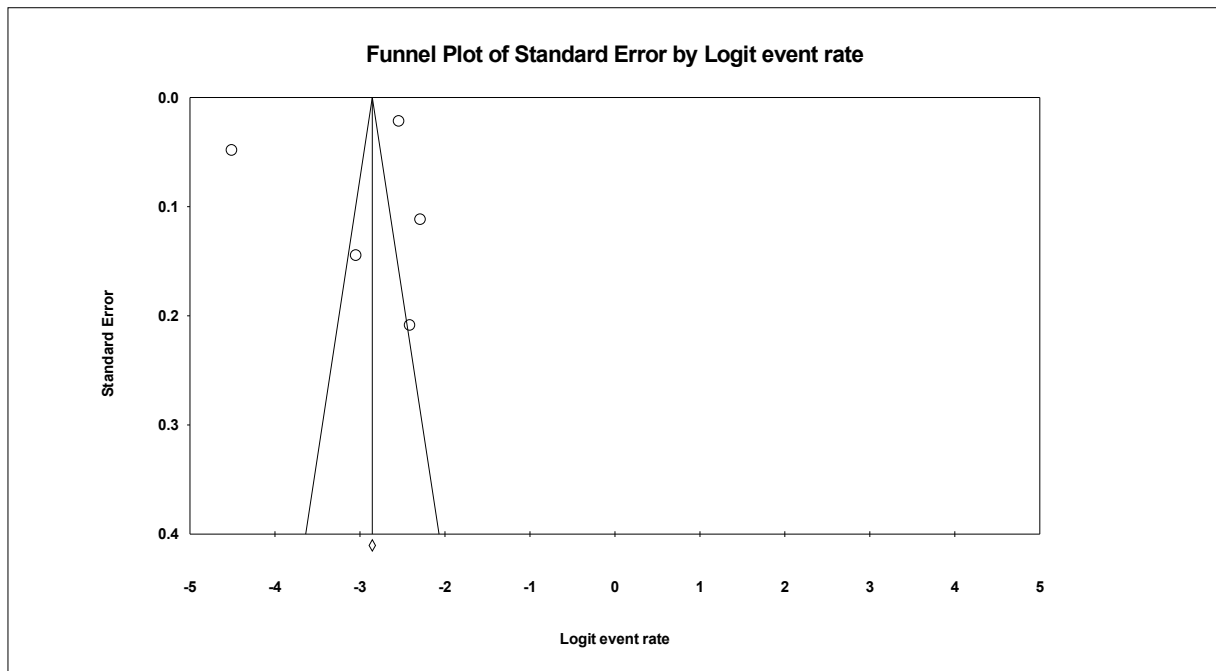

Supplement: s1 [file s1]
